# Supplementary material
Source: Research Square preprint supplement (doi:10.21203/rs.3.rs-9587728/v1)
Supplement: Supplementary file 1 [file 1d3598fb0bf0bf83a65e5d95.docx]

## Appendix B

## Survey on the Presentation of Qiang New Year Culture in Virtual Reality (VR) Environments

**Basic Information**

**Part I: Basic Information & Sample Calibration**

**Dear Participant,**

Thank you for participating in this academic study. This survey evaluates the integration and transmission efficacy of Qiang New Year (Reezheer) cultural elements within interactive Virtual Reality (VR) environments.

Your feedback will contribute directly to a community-validated framework for safeguarding Intangible Cultural Heritage (ICH) through digital media. This questionnaire is anonymous, your data will be used strictly for academic analysis, and your privacy is fully protected under institutional guidelines.

**Gender:**

**☐ Male**

**☐ Female**

**☐ Non-binary / Other**

**Age:**

**☐ 18–25**

**☐ 26–35**

**☐ 36 and above**

**Primary Professional Identity (Crucial for Sample Calibration):**

**☐ Full-time Student (Undergraduate / Graduate)**

**☐ Cultural Heritage Practitioner / Museum Specialist / Academic Researcher**

**☐ VR / Digital Media / Game Industry Professional**

**☐ Other Professional / Creative Industry Worker**

**Do you have a Qiang ethnic background or belong to the local Qiang community?**

**☐ Yes**

**☐ No**

**Have you ever personally participated in or formal learned about the Qiang New Year festival before?**

**☐ Yes**

**☐ No**

**Part II: Core Evaluation Scale (5-Point Likert Scale)**

**Instructions: Please rate the following statements based on your perspective or your experience with the VR prototype.**

**(1 = Strongly Disagree [SD], 2 = Disagree [D], 3 = Neutral [N], 4 = Agree [A], 5 = Strongly Agree [SA])**

**Dimension A: Environmental Cognition & Social Spatial Structure (EC)**

**A1. It is essential for the VR environment to accurately reproduce the physical ecosystems (e.g., mountains, rivers, ancestral villages) of the Aba region to ground the cultural experience.**

**[SD] [D] [N] [A] [SA]**

**A2. Recreating iconic geographic markers (e.g., historical Qiang watchtowers, traditional stone layouts) is effective for increasing cultural awareness among younger users.**

**[SD] [D] [N] [A] [SA]**

**A3. Showcasing localized social spaces (e.g., family hearths, communal ritual spaces) during the festival significantly enhances user immersion and spatial presence.**

**[SD] [D] [N] [A] [SA]**

**Dimension B: Social & Psychological Role Construction (SR)**

**B1. Allowing users to customize avatars using authentic Qiang garments and accessories is a necessary specification for self-identity engagement.**

**[SD] [D] [N] [A] [SA]**

**B2. Aligning the digital characters' backgrounds, behaviors, and social roles with authentic Qiang New Year traditions strengthens user engagement.**

**[SD] [D] [N] [A] [SA]**

**B3. Utilizing non-verbal behaviors (e.g., traditional etiquette gestures, ritual body language) is critical for authentic interaction in the ritual environment.**

**[SD] [D] [N] [A] [SA]**

**Dimension C: Musical Culture, Soundscapes, and Perceptual Experience (MC)**

**C1. Integrating traditional Qiang musical instruments (e.g., Qiang flute) and singing styles during the festival sequences is vital for acoustic authenticity.**

**[SD] [D] [N] [A] [SA]**

**C2. Incorporating authentic Qiang dialects and localized expressions in character dialogues enhances the linguistic realism of the heritage experience.**

**[SD] [D] [N] [A] [SA]**

**C3. Designing multi-layered dynamic soundscapes (e.g., ambient sound of shifting crowds, ceremonial chanting) triggers effective situational perception.**

**[SD] [D] [N] [A] [SA]**

**Dimension D: Deconstruction and Interpretation of Ritual Symbols (RI)**

**D1. The VR experience must accurately illustrate the chronological sequence of Qiang New Year celebrations as they unfold from private spaces to public arenas.**

**[SD] [D] [N] [A] [SA]**

**D2. Embedding the philosophical meanings of Qiang myths, legends, and totems into the virtual world provides a necessary layer of cognitive depth.**

**[SD] [D] [N] [A] [SA]**

**D3. Interactive design tasks (e.g., virtually participating in a ritual sequence) are more effective for encoding ritual symbolism than passive viewing.**

**[SD] [D] [N] [A] [SA]**

**Dimension E: Craftsmanship and Material Culture Experience (CM)**

**E1. The VR system should display micro-level material variations in traditional clothing to reflect distinctions between different Qiang valleys/villages.**

**[SD] [D] [N] [A] [SA]**

**E2. Providing interactive opportunities to simulate traditional Qiang craftsmanship (e.g., embroidery, building techniques) deepens the evaluation of intangible skills.**

**[SD] [D] [N] [A] [SA]**

**E3. Balancing the functional depiction of cultural artifacts with deep explanations of their symbolic meanings is crucial for meaningful cultural learning.**

**[SD] [D] [N] [A] [SA]**

**Dimension F: Interactive Design and Immersive Exploration (ID)**

**F1. Collaborative tasks or social interaction mechanics within the VR space are highly attractive for sustaining the interest of younger demographics.**

**[SD] [D] [N] [A] [SA]**

**F2. Embedding culturally contextualized re-enactments (e.g., prayer rituals, sacrificial ceremonies) directly predicts cultural recognition outcomes.**

**[SD] [D] [N] [A] [SA]**

**F3. Diversifying the interactive formats (e.g., combining serious gaming, virtual social spaces, and cross-media elements) enhances long-term engagement.**

**[SD] [D] [N] [A] [SA]**

**Dimension G: Integration of Cognitive, Emotional, and Social Dimensions (CE)**

**G1. Implementing structural feedback mechanisms (e.g., progression tracking, cultural milestones) is essential to position VR as an effective medium for ICH transmission.**

**[SD] [D] [N] [A] [SA]**

**G2. Continuous collaboration with cultural workers, elders, and academic experts is critical to prevent misrepresentation in digital game content.**

**[SD] [D] [N] [A] [SA]**

**G3. Ensuring that digital heritage projects structurally co-benefit the local source communities is a necessary ethical standard for sustainable preservation.**

**[SD] [D] [N] [A] [SA]**

**Dimension H: Cultural Historical Authenticity & Temporal-Spatial Framework (HA)**

**H1. Recreating micro-historical events based on verified documentary archives is vital for establishing the historical authenticity of the VR world.**

**[SD] [D] [N] [A] [SA]**

**H2. The narrative should interweave prominent historical figures with the daily family stories of ordinary Qiang individuals across historical eras.**

**[SD] [D] [N] [A] [SA]**

**H3. Granular visual and behavioral details of a specific historical period’s village structure significantly elevate the user's perception of existential authenticity.**

**[SD] [D] [N] [A] [SA]**

**Dimension I: Anthropological Cultural Acceptance Models (CA_Model)**

**I1. Applying multidisciplinary frameworks (anthropological, sociological, and historical) during asset creation validates the digital representation of complex cultural systems.**

**[SD] [D] [N] [A] [SA]**

**I2. Incorporating structural socioeconomic mechanics (e.g., virtual social identities, kinship networks, symbolic artifact exchanges) is more critical than superficial asset skinning.**

**[SD] [D] [N] [A] [SA]**

**I3. Adopting participatory ethnographic field research as an input method for VR asset production is highly effective for ensuring cultural accuracy.**

**[SD] [D] [N] [A] [SA]**

**Dimension J: Narrative Framework and Cultural Symbol Analysis (NF)**

**J1. Utilizing localized narrative structures (e.g., non-linear story loops, folklore flashbacks) helps non-Qiang users better respect cross-cultural knowledge boundaries.**

**[SD] [D] [N] [A] [SA]**

**J2. Integrating meticulous narrative explanations for specific totems, ceremonial colors, and ritual items prevents the commercial erosion of cultural meanings.**

**[SD] [D] [N] [A] [SA]**

**J3. Allowing users to make critical story decisions that impact the flow of the ritual narrative evokes stronger emotional resonance and cognitive retention.**

**[SD] [D] [N] [A] [SA]**
