# Supplementary material
Source: Research Square preprint supplement (doi:10.21203/rs.3.rs-9587728/v1)
Supplement: Supplementary file 2 [file 908e8cbc19db81a7703ee51e.docx]

## Appendix A

## Semi-Structured Interview Outline

## Overview of the Qualitative Phase

| **User Interview Content** |
| --- |
| **Research Purpose:** This semi-structured interview protocol serves as the qualitative foundation (Stage 1a) for exploring user behavioral motivations, experiential cognition, and psychological perceptions regarding digital Intangible Cultural Heritage (ICH) interventions. The transcribed texts will undergo Strauss and Corbin’s three-tier grounded theory coding to inductively derive the latent variables and causal pathways formalized in the subsequent structural equation modeling (SEM) phase.**Target Audience:** Purposive and theoretical sampling across two cohorts: (1) Native Qiang community members and cultural practitioners; (2) Non-Qiang users with digital heritage or immersive media (VR/Gaming) engagement. |
| **1.User Information** |
| Participant Pseudonym/ID: [e.g., P01, P02]Age & Gender:3. Ethnicity / Cultural Background: (Qiang Native / Non-Qiang Native)Professional Identity: (Student / Heritage Professional / Creative Industry Worker / Tech Specialist)Familiarity with VR / Immersive Media: (None / Intermittent / Expert) |
| **2: Interview Protocols** |
| **Part 1: Baseline Immersive Media Behavior & Motivations**  Which digital platforms or immersive media formats (e.g., VR, serious games, simulation operations) do you interact with most frequently? What are the primary driving motivations (e.g., identity seeking, leisure, cognitive learning) behind your choices?  When you encounter digital platforms that present historical or cultural narratives, what elements determine whether you remain engaged or abandon the system?  How do you perceive the difference between consuming culture through flat-screen mediums (text/video) versus immersive technologies (VR/XR)?  **Part 2: Environmental Cognition & Social-Spatial Perception**  When entering a virtual reconstruction of an ethnic cultural landscape (such as an ancestral Qiang village or a ritual mountain), what visual, acoustic, or environmental cues do you look for to construct your sense of "being there" (presence)?  In your view, how should the relationship between physical geographical environments (e.g., watchtowers, traditional stone hearths) and the non-material social spaces of a festival (e.g., communal ritual altars) be balanced in a digital environment?  How do environmental details (e.g., the texture of cultural artifacts, ambient soundscapes of crowds or ethnic flutes) alter your spatial awareness and cognitive understanding of a culture you might be unfamiliar with?  **Part 3: Social-Psychological Roles & Symbolic Interactions**  If a VR heritage system permits you to inhabit a specific cultural role (e.g., a Shibi priest leading a ceremony, or a villager participating in the sheepskin drum dance) rather than acting as a passive spectator, how would this alter your psychological involvement?  To what extent do you feel that utilizing non-verbal interactions (such as performing authentic traditional etiquette, following ritual gestures, or reacting to NPC behavior patterns) shapes your sense of social and cultural identity within the digital environment?  How do you interpret the symbolic meaning of ritual artifacts (e.g., specific totems, ceremonial attire, sacred tools) when they are embedded within interactive mechanics rather than just displayed as static 3D assets?  **Part 4: Cultural-Historical Authenticity & Existential Resonance**  How do you assess the "realness" or "authenticity" of an intangible cultural heritage practice (like the Qiang New Year) when it is mediated through digital technology? What constitutes the threshold of "documentary accuracy" versus "existential/emotional realness" for you?  If a digital heritage game introduces creative narrative formats (e.g., non-linear storytelling, ancestral myths, or personalized story loops), does it enhance or diminish your respect for the cultural origin and history of the heritage?  Have you ever experienced a moment of deep "cultural resonance" or emotional investment in a digital cultural heritage space? What specific contextual or narrative factors triggered that experience, and how did it influence your subsequent cultural acceptance?  **Part 5: Critical Constraints, Evaluation Criteria, and Future Iterations**  What are your primary concerns or anxieties when ethnic minority rituals and sacred folk traditions are transformed into interactive entertainment platforms (e.g., worries about commercial distortion, cultural misrepresentation, or tokenism)?  If you were to design or optimize an interactive system specifically dedicated to the transmission and safeguarding of the Qiang New Year (Reezheer), what mechanisms would you implement to ensure both community legitimacy and intergenerational learning?  How should structural guidance elements (e.g., interactive navigation, localized voice-overs, cognitive scaffolds) be configured in a digital heritage space to ensure that non-Qiang users can penetrate the surface actions and comprehend the underlying "thick description" of the ritual logic? |
